# Supplementary material for: Portfolio Allocation, Risk Aversion, and Digital Literacy Among the European Elderly
Source: publisher site journal article supplement (doi:10.1515/econ-2022-0072), 2024-01-01
Supplement: Supplementary file [file Original_submission.pdf]

# Economics

## Portfolio allocation, risk aversion and digital literacy among the European elderly --Manuscript Draft--

|                                     |                                                                                                                                                                                                                                                                                                                                                                                                                                                                                                                                                                                                                                                                                                                                                                                                                                                                                                                                                                                                                                      |
|-------------------------------------|--------------------------------------------------------------------------------------------------------------------------------------------------------------------------------------------------------------------------------------------------------------------------------------------------------------------------------------------------------------------------------------------------------------------------------------------------------------------------------------------------------------------------------------------------------------------------------------------------------------------------------------------------------------------------------------------------------------------------------------------------------------------------------------------------------------------------------------------------------------------------------------------------------------------------------------------------------------------------------------------------------------------------------------|
| <b>Manuscript Number:</b>           | ECONJOURNAL-D-23-00204                                                                                                                                                                                                                                                                                                                                                                                                                                                                                                                                                                                                                                                                                                                                                                                                                                                                                                                                                                                                               |
| <b>Full Title:</b>                  | Portfolio allocation, risk aversion and digital literacy among the European elderly                                                                                                                                                                                                                                                                                                                                                                                                                                                                                                                                                                                                                                                                                                                                                                                                                                                                                                                                                  |
| <b>Article Type:</b>                | Research Article                                                                                                                                                                                                                                                                                                                                                                                                                                                                                                                                                                                                                                                                                                                                                                                                                                                                                                                                                                                                                     |
| <b>Keywords:</b>                    | Portfolio choices; Stock market participation; Digital divide; Elderly people                                                                                                                                                                                                                                                                                                                                                                                                                                                                                                                                                                                                                                                                                                                                                                                                                                                                                                                                                        |
| <b>Manuscript Region of Origin:</b> | ROMANIA                                                                                                                                                                                                                                                                                                                                                                                                                                                                                                                                                                                                                                                                                                                                                                                                                                                                                                                                                                                                                              |
| <b>Abstract:</b>                    | <p>This paper contributes to the literature on portfolio choices of elder persons by examining the influence of digital literacy on the propensity to own risky assets, when considering individual- and country-level variables. Our empirical analysis is based on data from Survey of Health, Ageing and Retirement in Europe (SHARE) and a set of macroeconomic indicators retrieved from international databases. To capture the impact of individual- and country-level factors, we have utilized multilevel models with a two-level sampling design. The results obtained provide evidence for a positive relationship between individual- and country-level digital literacy and portfolio riskiness, as well as heterogeneity in the portfolio choices of older individuals across the EU countries. In addition, age is found to influence differently the portfolio riskiness of elder persons across the EU countries. Bridging the digital divide may provide access to balanced-risk portfolios for elder persons.</p> |
| <b>Manuscript Classifications:</b>  | 7.4.2: Portfolio Choice • Investment Decisions                                                                                                                                                                                                                                                                                                                                                                                                                                                                                                                                                                                                                                                                                                                                                                                                                                                                                                                                                                                       |

## Title

### **Portfolio allocation, risk aversion and digital literacy among the European elderly**

## Authors

**Adrian-Gabriel Enescu**, Transilvania University of Brasov, Romania, PhD student

**Monica Raileanu Szeles**, Transilvania University of Brasov and Institute for Economic Forecasting, Romania, Prof.

## Abstract

This paper contributes to the literature on portfolio choices of elder persons by examining the influence of digital literacy on the propensity to own risky assets, when considering individual- and country-level variables. Our empirical analysis is based on data from Survey of Health, Ageing and Retirement in Europe (SHARE) and a set of macroeconomic indicators retrieved from international databases. To capture the impact of individual- and country-level factors, we have utilized multilevel models with a two-level sampling design. The results obtained provide evidence for a positive relationship between individual- and country-level digital literacy and portfolio riskiness, as well as heterogeneity in the portfolio choices of older individuals across the EU countries. In addition, age is found to influence differently the portfolio riskiness of elder persons across the EU countries. Bridging the digital divide may provide access to balanced-risk portfolios for elder persons.

**Keywords:** Portfolio choices, Stock market participation, Digital divide, Elderly people

**JEL Codes:** G11; F30.

## 1. Introduction

The last two decades were marked by breakthroughs in information communication technologies (ICTs), which provided new opportunities for economic development all over the world, but especially in developing and developed countries. Despite the improvements in connectivity and enhanced productivity generated by technological improvements, persons who cannot utilize digital tools and platforms may be marginalized, suffering from different forms of the digital divide. The digital divide is prominent between younger and older persons since younger individuals are more experienced with technology and have grown up with more exposure to technology. Nevertheless, the digital divide can impede older individuals from undergoing important activities and benefiting from opportunities, including those related to personal finances and investments.

Retirement represents a phase of life when people often (re)consider investing in financial assets as an opportunity to simply increase the income replacement rate. However, the lack of digital skills may represent a burden, especially for elder persons, when purchasing

financial assets and absorbing financial information. Consequently, the portfolio choices of individuals can be influenced in various manners by digital literacy, including the use of online trading platforms for processing buy and sell orders, the access and analysis of financial data using the internet for making informed decisions, as well as using the newly emerged robo-advisors.

The literature shows that the digital divide continues to represent a persistent issue in the European Union, even though several efforts have been made to reduce the digital gap. The first-order digital divide is concerned with the access of individuals to ICT. The uneven access to ICT could determine the marginalization of individuals and communities (Elena-Bucea et al., 2021). However, the focus in the literature has shifted from the simple access to ICT to the skills of individuals and communities in using ICT, namely the second-order digital divide, and the tangible outcomes of using technology (i.e., third-level digital divide). Several categories of citizens are more prone to lack digital skills and more vulnerable to being affected by the digital divide in the European Union: older persons living in sparsely populated areas, especially older women, or elder individuals with a low level of education, little internet use, and a relatively low level of income (Botrić and Božić, 2021; Vasilescu, 2020).

The portfolio allocation of elder individuals was previously analyzed by various studies. The following determinants were considered to influence the propensity to own stocks, either directly or indirectly through mutual funds or retirement accounts: psychological factors (Angelini and Cavapozzi 2017; Buccioli and Zarri, 2017; Georgarakos and Pasini, 2011), cognitive abilities (Christelis et al., 2010), and the social network (Berman and Litwin, 2018). Other predictors that could influence the investment behavior of elder persons were considered, including the health status and the coverage of the healthcare system (Atella et al., 2011; Banks et al., 2020), as well as the existence of a life insurance policy (Cavapozzi et al., 2013).

Our research makes three distinct contributions to the literature. First, we examine the influence of digital skills at the individual level and country level on the portfolio riskiness of senior persons. To the best of our knowledge, the relationship between digital skills and portfolio choices of senior persons was not examined so far in the literature. Elderly persons represent a vulnerable category for ICT marginalization. Our empirical results suggest the access of older individuals to riskier financial assets might be improved by reducing the digital divide, which might subsequently create investment opportunities. Second, our paper introduces novel variables in the empirical analysis at both individual- and country- levels, providing a starting point for policy formulation to reduce the digital divide. Finally, we combine data obtained from wave eight of SHARE with data from international databases, which enables us to identify the influence of digital literacy at the individual- and country- levels on portfolio riskiness.

The empirical analysis is conducted using multilevel models, more specifically two-level random intercept models with covariates, as well as a two-level random slope model. For the models, the likelihood ratio (LR) test establishes that the models are adequate compared to single-level models and models with fewer predictors. The data from our empirical analysis is clustered at two different levels: individuals (Level 1) are nested in 25 European Union countries (Level 2). The predictors utilized in the empirical analysis were based on theoretical considerations, including common socio-demographic control variables and variables indicating more recent forms of digital literacy.

The multilevel logistical models that we have applied enable us to depict the within- and between- country variation across the EU, as to finally identify heterogeneous interest in

financial assets. Furthermore, we investigate the impact of age on portfolio riskiness across different countries by using random slopes for age in a multilevel logistic regression. The individual- and country-level data were retrieved from three datasets: (1) wave eight of the Survey of Health, Ageing and Retirement in Europe (SHARE), which was collected in 2019/2020, (2) Eurostat, and (3) Digital Economy and Society Index.

The rest of the paper is organized as follows. Chapter 2 is dedicated to the analysis of the specialized literature. Chapter 3 introduces the databases and the methods that were used. Chapter 4 is dedicated to results and interpretations, while Chapter 5 is dedicated to conclusions and discussions.

## **2. Literature review**

### *2.1. Measures of the digital divide*

The popularity of ICT increased exponentially in the last decades and various factors intensified its adoption. ICT has become a forefront of growth for humanity and the societal reliance at the present and in the future on technology is undisputed. Despite the numerous benefits and subsequent potential for boosting productivity and reducing costs for companies, the evolution of ICT has been commonly associated with concerns regarding increasing disparities in its use and access.

Initially, the term ‘digital divide’ was first utilized in the mid-1990s by Larry Irving, Jr., who served as the head of the National Telecommunications Infrastructure Administration (Çilan et al., 2009). The definition of ‘digital divide’ given by OECD (2001) is still relevant and accurately defines this phenomenon as “the gap *between individuals, households, businesses and geographic areas at different socio-economic levels with regard both to their opportunities to access information and communication technologies (ICTs) and to their use of Internet for a wide variety of activities*”. The term ‘digital exclusion’ was also coined in the literature and indicates a complex and dynamic phenomenon (Van Dijk & Hacker, 2003). Both terms refer to the segregation of individuals regarding technology access and skills, which hinder reaping the benefits of technology.

The literature pertaining to the digital divide has shifted its focus over time. In the beginning, plenty of articles focused on the adoption of the internet, namely, if persons have access to the internet, being the indicator of foremost importance for measuring the digital divide (Botrić and Božić, 2021). This is commonly referred to as the first-order digital divide, addressing the lack of adoption, “have access to ICT” or “have not access to ICT”, which is considered obsolete and imprecise (Dewan and Frederick, 2005; Warschauer, 2003). Subsequent studies were concerned with the frequency of use of the internet.

Beyond the access gap to ICT, a divide was identified regarding the skills and literacy among persons who already have access to ICT, which is known as the ‘second-order digital divide’ (Dewan and Riggins, 2005) or ‘second-level digital divide’ (Friemel and Signer, 2010). This divide emphasized that how individuals, organizations, and countries use ICT should be also considered, beyond the simple access gap. The recurring factors that determine the presence of the second-level digital divide were analyzed for vulnerable population groups. Frequently, digital inequalities reflect offline inequalities, such as socioeconomic resources, physical abilities, and knowledge (Vassilakopoulou and Eli, 2021).

Additional factors beyond socioeconomic factors that contribute to the digital divide were analyzed in the specialized literature, namely, a) motivation; b) personality traits; and c)

digital skills. A large body of studies focuses on elder persons since they faced barriers to becoming familiar with technology, as opposed to younger individuals who grew up using technology since childhood. There is no established classification for persons who adhere to the definition of older or citizens since there exist different thresholds for grouping individuals based on their age: older adult age might correspond to individuals aged over 45 years (Czaja et al., 2013), over 51 years (Cotten et al., 2012, 2014; Silver, 2014), over 60 years (Lam and Lam, 2009), or over 65 years (e.g. Gell et al., 2015; Friemel, 2016; Quan-Haase et al., 2017).

The slow adoption of technology by the older population may be caused by the following key aspects, which the older themselves identified: negative attitude towards technology, fear, and anxiety when using digital services and technology, lack of knowledge, difficulties understanding digital terminology, as well as having a sense of being too old for learning (Holgersson and Söderström, 2019).

Various intervention methods have been identified to mitigate the barriers to using technology by elder persons. At the family level, having the support of the members of the family is essential in overcoming these hindrances and improving digital skills. The support of family can be either emotional, regarding patience, praise, comfort, and encouragement, which decrease technology anxiety, or cognitive support which facilitates the learning and development of digital skills (Xiong and Zuo, 2019).

Outside the family, the second-order digital divide can be reduced by designing adequate policy interventions. For instance, employers could take greater responsibility for the IT education of the employees when they are close to retirement since employment has a central role in explaining the usage of e-government services (Sipior et al., 2011). Therefore, the prevention of digital exclusion may be achieved by developing the digital skills of seniors before retirement (Rockmann et al., 2018). The mitigation of digital gaps can be attained through proper training and education (Van Dijk, 2012).

The third level of digital inclusion was labeled in the literature as the ‘third-level digital divide’, which focused on the investigation of tangible outcomes rather than skills and simple usage (Van Deursen et al., 2015). The disparities in the third level of digital inclusion are considering the social and cultural benefits derived from using and accessing the technology, rather than just having the necessary skills and access, as in the previous levels.

## *2.2. Portfolio allocation of elder persons*

A rich theoretical and empirical body of literature focused on various determinants of household portfolio choices of elder persons, including the decision to hold financial assets and the share of given assets to the whole portfolio. Determinants such as psychological factors, cognitive abilities, health status, the coverage of the healthcare system, the existence of a life insurance policy, and the presence of an endowment were predominantly considered in the specialized literature.

There is a large body of literature examining the impact of psychological factors on the propensity to own stocks. For instance, the relationship between dispositional optimism and stock market participation was examined using the second wave of SHARE for twelve European countries and it was discovered that optimism is positively related to the probability of stock ownership and the percentage of wealth invested in stocks (Angelini and Cavapozzi 2017). Multiple studies analyzed the relationship between the Big Five personality traits and household financial decisions. Brown and Taylor (2014) found that unsecured debt and savings correlate with some Big Five personality traits, namely, Conscientiousness, Extraversion, and

Agreeableness. The correlation between specific asset classes and personality traits was examined in the same study and a negative correlation was identified between stock ownership and Extraversion (for couples) and Agreeableness (for single persons). Bucciol and Zarri (2017) argued that three personality traits are negatively correlated with financial risk-taking: Anxiety, Agreeableness, and Cynical Hostility using waves of the US Health and Retirement Study (HRS). In another study using Finnish data to examine the link between personality traits (and facets) and stock market participation, harm avoidance was identified to negatively correlate with stock ownership (Conlin et al., 2015). Georgarakos and Pasini (2011) stated that trust and sociability play distinct roles in stock market participation and should be considered when analyzing households' stock market participation.

The impact of cognitive abilities on the inclination of individuals to invest in stocks was also investigated in the literature. The association between cognitive abilities and direct stock market participation and indirect participation through retirement accounts or mutual funds is a common finding in the literature (Christelis et al., 2010). More specifically, the association was driven by information constraints since less information-intensive assets were less strongly related to cognitive abilities. The social network is another relevant predictor for investing in risky assets. Stock ownership is positively correlated with the size of the social network and the components of the social network are also important in the investment decision-making process (Berman and Litwin, 2018).

The investment behavior of older persons was found to be influenced by other factors, including health status and the coverage of the healthcare system. The perceived health status is more important than the objective health status in establishing portfolio decisions (Atella et al., 2011). Older individuals are less likely to own risky assets, health changes, and other life events influencing portfolio riskiness (Banks et al., 2020). The influence of the presence of a life insurance policy was also examined in the literature, and individuals with life insurance are found to be more likely to own stocks or invest in mutual funds (Cavapozzi et al., 2013).

### **3. Data and Methods**

#### *3.1. Data*

We have conducted our empirical analysis using individual- and country-level data from three datasets: (1) wave eight of the Survey of Health, Ageing and Retirement in Europe (SHARE), which was collected in 2019/2020, (2) Eurostat, and (3) Digital Economy and Society Index. A short description of data and variables of interest is provided below. In the SHARE dataset, the persons eligible to participate in this survey consisted of persons aged 50 years and over at the time of sampling and who had their domicile in the analyzed SHARE country (i.e., persons born before 1969 at the time of the interview). The data comprised in the SHARE database includes microdata about socioeconomic status, health, as well as social networks in various European countries, creating a cross-national panel database.

Our sample included 42,584 individuals from 25 European Union countries: Austria, Germany, Sweden, Netherlands, Spain, Italy, France, Denmark, Greece, Belgium, Czech Republic, Poland, Luxembourg, Hungary, Slovenia, Estonia, Croatia, Lithuania, Bulgaria, Cyprus, Finland, Latvia, Malta, Romania, and Slovakia. We have excluded from our analysis the other countries that were available in the SHARE database: Israel and Switzerland. We focused our attention on the European Union countries since they adhere to the same political

and economic framework, sharing common characteristics, allowing us to investigate individual- and group-level effects.

Financial and real assets have a dedicated section in the SHARE database, which includes information about various types of investments. More specifically, respondents are asked if they: (a) have stocks; (b) have bonds; (c) have mutual funds; (d) have individual retirement accounts; and (e) have contractual savings. For respondents who invested in mutual funds or individual retirement accounts, they were further asked if mutual funds/individual retirement accounts are invested: (i) mostly in stocks; (ii) half in stocks half in bonds; (iii) mostly in bonds. Using the financial information from the SHARE database, we have constructed a proxy that measures the investment profile of investors, by respecting the portfolio allocation methodology of Atella et al. (2011). The authors established this classification by following the literature on portfolio allocation (Guiso et al., 2002; Rosen and Wu, 2004; Brunetti and Torricelli, 2010). We have created an ordinal categorical variable measuring the portfolio riskiness, which ranges from values 1 to 3, where 1 corresponds to a safe allocation (contractual savings), 2 represents a moderately safe allocation (having bonds and not having stocks/mutual funds invested half in stocks and half in bonds or mostly in bonds/retirement accounts are invested half in stocks and half in bonds or mostly in bonds), 3 represents a risky allocation (having stocks and not having bonds and not having contractual savings/mutual funds are invested mostly in stocks and not having bonds and not having contractual savings/retirement accounts are invested mostly in stocks and not having bonds and not having contractual savings).

In addition to the SHARE database, we have also used Eurostat data which captures country-level economic, poverty, and education conditions. We have obtained country-level data regarding digital skills from the Digital Economy and Society Index (DESI). Table 1 depicts the summary statistics of the dataset. The sample statistics provided illustrate that the average age of respondents was 70 years old, and the majority of respondents were female (57%), while only 16.3% of respondents were still employed or self-employed.

The individual-level variables are explained below. Portfolio riskiness is an ordinal categorical variable where 1 - safe investments, 2 – fairly-safe investments; 3 – risky investments. Life satisfaction is measured on a 0 to 10 scale, where 10 corresponds to the highest life satisfaction. Risk aversion is measured on a 0-4 ordinal scale, where the highest risk aversion is 4. Computer skills are measured on a 0-5 ordinal scale, where the highest value corresponds to excellent computer skills. Use of the internet in the past 7 days, gender, age, and years of education are other explanatory variables. The last 4 variables from Table 1 are country-level variables and are expressed in %.

**Table 1.** Summary statistics of the dataset

| Variables               | Full sample |           |     |     | Female |           | Male   |           |
|-------------------------|-------------|-----------|-----|-----|--------|-----------|--------|-----------|
|                         | Mean        | Std. dev. | Min | Max | Mean   | Std. dev. | Mean   | Std. dev. |
| Sample size             | 42,584      |           |     |     | 24,276 |           | 18,308 |           |
| <b>Individual level</b> |             |           |     |     |        |           |        |           |
| Portfolio riskiness     | 0.3522      | 0.8668    | 0   | 3   | 0.3047 | 0.8009    | 0.4154 | 0.9435    |
| Life satisfaction       | 7.5578      | 2.1788    | -2  | 10  | 7.5275 | 2.1511    | 7.5980 | 2.2144    |
| Risk aversion           | 3.6379      | 0.9379    | -2  | 4   | 3.6983 | 0.8785    | 3.5598 | 1.0043    |

|                                                                 |        |        |        |        |        |        |        |        |
|-----------------------------------------------------------------|--------|--------|--------|--------|--------|--------|--------|--------|
| Computer skills                                                 | 1.3684 | 1.4649 | 0      | 5      | 1.3591 | 1.4550 | 1.3805 | 1.4779 |
| Use of internet in past 7 days                                  | 0.5441 | 0.4981 | 0      | 1      | 0.5282 | 0.4992 | 0.5652 | 0.4957 |
| Years of education                                              | 10.839 | 3.8538 | -3     | 25     | 10.609 | 3.9851 | 11.136 | 3.6558 |
| Male or female                                                  | 1.5700 | 0.4951 | 1      | 2      | 2      | -      | 1      | -      |
| Age                                                             | 70.649 | 9.0497 | 55     | 103    | 70.637 | 9.2319 | 70.666 | 8.8025 |
| <b>Country level</b>                                            |        |        |        |        |        |        |        |        |
| Real GDP/capita growth rate (%)                                 | 0.0234 | 0.0148 | 0.0024 | 0.0492 | -      | -      | -      | -      |
| Above basic level of digital skills (for persons aged 55-74, %) | 0.1248 | 0.0649 | 0.0264 | 0.2779 | -      | -      | -      | -      |
| Ordering online (%)                                             | 0.6065 | 0.1632 | 0.2171 | 0.8415 | -      | -      | -      | -      |
| Severely materially and socially deprived (%)                   | 0.0598 | 0.0539 | 0.014  | 0.245  | -      | -      | -      | -      |

### 3.2. Methods

The methodological approach utilized in our paper includes multilevel (hierarchical or mixed effects) models which allow the analysis of data with nested structures. The clustering of data in our analysis is based upon two different levels: individuals (Level 1) who are nested in 25 European Union countries (Level 2). The adequacy of using multilevel models in our empirical research was established after running specific tests, to identify if the data exhibit a high degree of clustering (Steele, 2008).

In all configurations of the models that we have applied, the response variable represents a proxy that we have constructed and measures the investment profile of investors, by respecting the portfolio allocation methodology of Atella et al. (2011), which is consistent with previous studies regarding capital allocation.

Firstly, we started our analysis with the simplest multilevel model which permitted us to identify the country effects on the investment profiles of individuals, without explanatory variables, which is also recognized as a ‘null multilevel model’.

$$y_{ij} = \beta_0 + u_{0j} + e_{ij} \quad (1)$$

Where,  $y_{ij}$  is the capital allocation proxy based on the three risk profiles that we have created,  $\beta_0$  is the overall mean across countries,  $u_{0j}$  is the effect of country  $j$  on the capital allocation, and  $e_{ij}$  is an individual-level residual. The subscript  $i$  corresponds to an individual



while the subscript  $j$  corresponds to a country. The country effects  $u_{0j}$  are also referred to as country (or level 2 residuals), which we suppose follow a normal distribution with mean zero and variance  $\sigma_{u0}^2$ . The estimation method for this regression was maximum likelihood.

To identify if the multilevel models are justifiable in our empirical research, we have applied another null single-level model by removing the random country effect.

$$y_{ij} = \beta_0 + e_{ij} \quad (2)$$

To identify if the multilevel models better fit the data, we have utilized the likelihood ratio (LR) test, where we have compared the null multilevel model with a null single-level model, at the 5% threshold. We have identified overwhelming evidence that supports the application of the multilevel model by carrying out a likelihood ratio (LR) test.

The null two-level model will be gradually enriched by adding predictors for the random intercept model and by allowing age to have a random slope in another model. The LR test will be used to examine if the additional variables are appropriate.

The random slope model in which the slope for age varies across countries is derived from the following equation:

$$y_{ij} = \beta_0 + \beta_1 x_{ij} + u_{0j} + u_{1j} x_{ij} + e_{ij} \quad (3)$$

Which can be rewritten in the following form:

$$\begin{aligned} y_{ij} &= \beta_{0j} + \beta_1 x_{ij} + e_{ij} \\ \beta_{0j} &= \beta_0 + u_{0j} \\ \beta_{1j} &= \beta_1 + u_{1j} \end{aligned} \quad (4)$$

Where, the random effects  $u_{0j}$  and  $u_{1j}$  are assumed to follow a normal distribution with zero means, variances  $\sigma_{u0}^2$  and  $\sigma_{u1}^2$  respectively, and covariance  $\sigma_{u01}$ . The average regression line or the grand mean slope is  $\beta_1$ , while the slope of the line for country  $j$  is  $\beta_1 + u_{1j}$ .

#### 4. Results and interpretations

The empirical analysis aims to explain older people's portfolio riskiness upon a set of individual- and country-level predictor variables, and to also find out which of the two types of variables has a higher explanatory power. To accommodate both individual- and country-level variables, the multilevel analysis is first considered to be used here. However, we first run a series of tests to check the appropriateness of this methodology.

The variance partition coefficient (VPC) is used in multilevel modeling to partition the variation in a dataset within groups or between groups and to suggest if a multilevel model is adequate, as opposed to a single-level model. The VPC for this regression is 0.122, which indicates that 12.2% of the variance in capital allocation can be attributed to differences between countries. The proportion of the total (residual) variance in the underlying propensity to have high interest in risky assets is attributable to differences between EU states. Aside from the VPC, we have applied likelihood ratio (LR) tests which established that a random intercept model fits better the data compared to a single-level model.

Table 2 reveals the empirical results we have obtained by applying a variance components model compared to two random intercept models. The first random intercept model includes only individual-level variables, while the second random intercept model includes both individual- and country-level variables. For the random intercept models,

portfolio riskiness was regressed on the set of variables that we have explained, and the coefficients of both models are similar and the direction of relationships between the predictors and the response variable is the same.

In Model 3 of Tab.2, the following country-level explanatory variables are added: national economic growth (variable Real GDP/capita growth rate), and above the basic level of digital skills (for persons aged 55-74). By running likelihood ratio tests we have established that adding the extra parameters for random intercepts was not worthwhile and we present therein the results without random intercepts for those variables.

The relationship between portfolio riskiness and life satisfaction is found to be statistically significant and positive, which indicates that the propensity of individuals to invest in the stock market is higher if the persons are satisfied with their lives. There are various channels through which life satisfaction might affect financial risk tolerance and the willingness of individuals to invest in risky assets (stocks). Firstly, this relationship may be attributable to the fact that individuals with high life satisfaction might have a good financial situation, which could be measured by income/pension or wealth. This result is consistent with previous studies from the specialized literature which argued that the impact of economic circumstances was underestimated, and economic factors significantly impact happiness (Powdthavee, 2010; Headey, Muffels, and Wooden, 2008). Therefore, a lack of life satisfaction might correlate with a lack of financial resources, implying that individuals who are not satisfied might not have the disposable funds to invest in risky assets.

Secondly, persons who are not satisfied and happy with their lives may exhibit regret, including financial regret. Previous studies from the specialized literature have identified that the inclination for regret and happiness in life has been identified to influence financial risk tolerance. If one individual experiences regret with a particular type of investment, then the tendency to make a similar investment is reduced (Jeffrey and Kinerson, 2005).

Risk aversion had a negative impact on portfolio riskiness, which is an anticipated and logical result, indicating that individuals with a higher risk aversion are less likely to invest in risky portfolios, which include directly or indirectly owned stocks. General risk aversion was previously identified to negatively affect risky investment preferences (Aydemir and Aren, 2017).

More importantly, computer skills and use of the internet in the last 7 days were both positively correlated with portfolio riskiness and the relationships were statistically significant, indicating that individuals with better digital skills were more inclined to include stocks directly in their portfolios or indirectly through mutual funds or individual retirement accounts than individuals who lacked digital skills and did not use the internet. This may be attributable to the necessary digital skills required to directly invest in stocks, since currently most of the trading is conducted online, either via the website of the broker or by using a mobile app. The buy/sell orders are processed online, which may impede older persons from trading if they do not possess digital skills or lack an internet connection. As far as indirect stock ownership is concerned, computer skills are required to invest in mutual funds too.

The impact of computer skills was further analyzed at the country level. The variable denoting the above basic digital skills (for persons aged 55-74 old) has a positive impact on the portfolio riskiness and is also significant at the 0.01 threshold. Individuals who have above basic digital skills are more prone to own risky assets (stocks) compared to individuals who lack such skills. This result provides further evidence of the presence of a relationship between digital skills and portfolio allocation among older individuals. Opening a brokerage account,

using mobile banking, and performing stock market orders require at least basic digital skills, therefore the variable utilized in this analysis is based on theoretical foundations.

**Table 2.** Regression output for variance components model vs. random intercept models

| VARIABLES                                                       | (1)<br>Variance<br>components<br>model | (2)<br>Random<br>intercept model I | (3)<br>Random<br>intercept model II |
|-----------------------------------------------------------------|----------------------------------------|------------------------------------|-------------------------------------|
| <b>Individual level variables</b>                               |                                        |                                    |                                     |
| Life satisfaction                                               | -                                      | 0.00913***<br>(0.00337)            | 0.00918***<br>(0.00336)             |
| Risk aversion                                                   | -                                      | -0.0371***<br>(0.00771)            | -0.0365***<br>(0.00771)             |
| Computer skills                                                 | -                                      | 0.0191***<br>(0.00728)             | 0.0185**<br>(0.00728)               |
| Use of internet in past 7 days                                  | -                                      | 0.0677***<br>(0.0214)              | 0.0638***<br>(0.0214)               |
| Years of education                                              | -                                      | 0.0155***<br>(0.00208)             | 0.0154***<br>(0.00208)              |
| Male or female                                                  | -                                      | -0.0117<br>(0.0137)                | -0.0110<br>(0.0137)                 |
| Age                                                             | -                                      | 0.000893<br>(0.000859)             | 0.000773<br>(0.000859)              |
| <b>Country-level variables</b>                                  |                                        |                                    |                                     |
| Real GDP/capita growth rate                                     | -                                      | -                                  | 3.212<br>(2.426)                    |
| Above basic level of digital skills<br>(for persons aged 55-74) | -                                      | -                                  | 2.726***<br>(0.623)                 |
| Ordering online                                                 | -                                      | -                                  | -0.187<br>(0.319)                   |
| Severely materially and socially<br>deprived                    | -                                      | -                                  | -0.0782<br>(0.571)                  |
| Random-effects parameters                                       |                                        |                                    |                                     |
| var(_cons)                                                      | 0.09046                                | 0.02594                            | 0.00842                             |
| var(Residual)                                                   | 0.64971                                | 0.41461                            | 0.41454                             |
| Observations                                                    | 9,173                                  | 9,173                              | 9,173                               |
| Number of groups                                                | 25                                     | 25                                 | 25                                  |

Standard errors in parentheses

\*\*\* p<0.01, \*\* p<0.05, \* p<0.1

[Note: The first model is also known as a ‘null’ multilevel model. Model (2) omits country-level variables, while model (3) includes both individual- and country-level variables.]

The standard socio-demographic indicators are included in the list of control variables: age, gender, and education, following the existing practices from the literature. The relationship

between portfolio riskiness and education is positive and statistically significant. Several studies support a positive correlation between financial risk tolerance and the level of education (Faff et al., 2009; Grable, 1997; Grable and Joo; 2004). Individuals with a higher level of education may be more prone to taking financial risks and investing in riskier assets. One channel that may explain this relationship might be the level of earnings which is positively correlated with education (Tamborini et al., 2015). Variables indicating the age and gender of persons were not statistically significant.

The national economic growth (variable Real GDP/capita growth rate) is found to have a non-significant relationship, which is also the case for the following country-level variables: ordering online and severely materially and socially deprived. Ordering online was considered in the analysis since it reflects a more recent form of the digital divide that concerns the results of using ICT. The country-level variable of severely materially and socially deprived was included in the analysis from theoretical considerations. As expected, a negative relationship was identified between material and social deprivation and portfolio riskiness.

To further examine the differences between countries regarding the interest of individuals in financial assets, we have analyzed the residuals of the variance components model. Figure 1 shows the estimated residuals for the EU states based on the variance components model. For a substantial number of states, the 95% confidence interval does not overlap zero, indicating that interest in financial assets is above average (above the zero line) or below average (below the zero line) at the 5% level for these states.

**Figure 1.** Residual estimates based on two-level variance-components ordinal logistic model

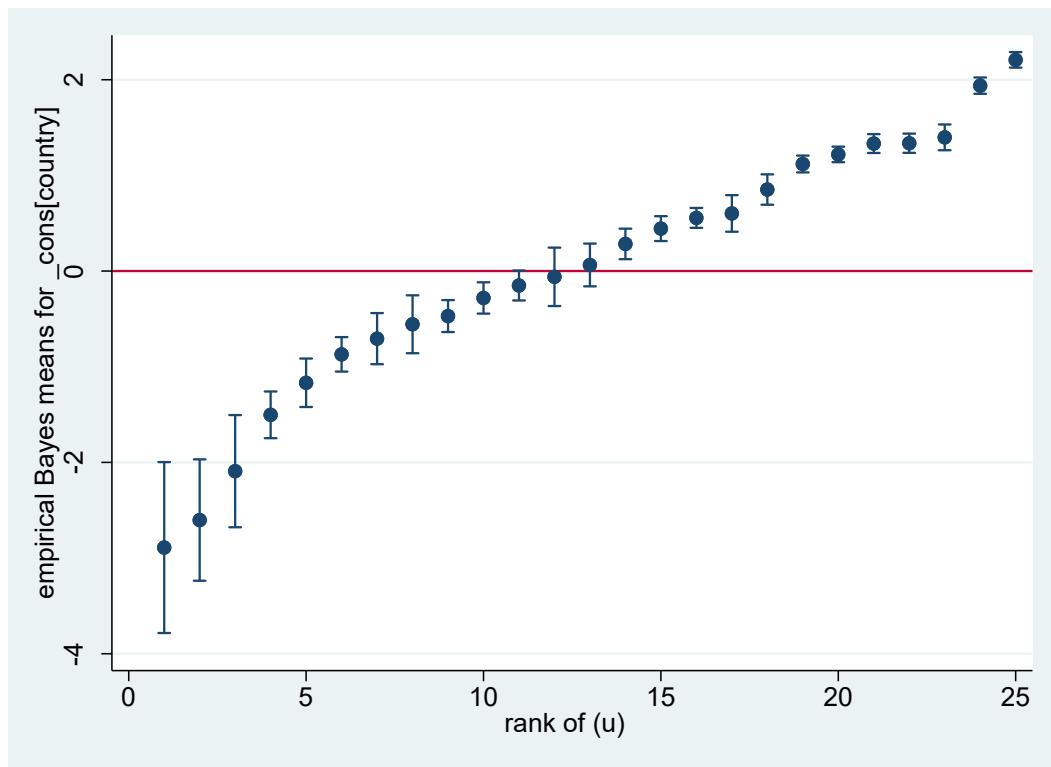

[Note: The country effects are in rank order together with a 95% confidence interval. The horizontal red line (at 0) represents the average country in the data.]

The list of the residual rank for each country from the EU is illustrated in Table 3, indicating how countries are situated compared to the baseline level regarding the risk aversion

for financial assets. The most risk-averse countries are Latvia, Romania, and Bulgaria, indicating that the interest for financial assets is considerably below average. Those countries exhibit financial risk aversion and individuals from those countries are more prone to invest in safer assets (saving accounts) rather than to invest in stocks directly or indirectly. Nordic countries such as Sweden, Denmark, and Finland are the countries that are the least financially risk-averse, and individuals are willing to invest in financial assets such as stocks. Other studies have identified significant stock ownership differences between stock market participation across EU countries. It has been argued that stock market participation is relatively high in Nordic countries since financial markets and institutions are more developed (Angelini and Cavapozzi, 2016). Countries within the EU exhibit a stark contrast in their capital allocation. Microdata analysis showed that the stock market participation of individuals with a low wealth in Sweden and Denmark is twice those of wealthy individuals from Austria, Spain, and Italy (Georgarakos and Pasini, 2011).

**Table 3.** The residual rank for the 25 EU member states based on the two-level variance-components ordinal logistic model

| Residual rank (urank) | Country        | Residual (u) |
|-----------------------|----------------|--------------|
| 1                     | Latvia         | -2.890016    |
| 2                     | Romania        | -2.602614    |
| 3                     | Bulgaria       | -2.091485    |
| 4                     | Greece         | -1.502938    |
| 5                     | Poland         | -1.167843    |
| 6                     | Estonia        | -0.870634    |
| 7                     | Croatia        | -0.7063709   |
| 8                     | Hungary        | -0.5562575   |
| 9                     | Slovenia       | -0.4705018   |
| 10                    | Italy          | -0.2812563   |
| 11                    | Spain          | -0.1510558   |
| 12                    | Cyprus         | -0.060284    |
| 13                    | Slovakia       | 0.0636038    |
| 14                    | Lithuania      | 0.2835576    |
| 15                    | Netherlands    | 0.4435831    |
| 16                    | Czech Republic | 0.5556223    |
| 17                    | Malta          | 0.6021659    |
| 18                    | Luxembourg     | 0.852118     |
| 19                    | France         | 1.119149     |
| 20                    | Germany        | 1.21891      |
| 21                    | Belgium        | 1.332912     |
| 22                    | Austria        | 1.3361       |
| 23                    | Finland        | 1.397493     |
| 24                    | Denmark        | 1.937838     |
| 25                    | Sweden         | 2.207618     |

We further examined the age effect on portfolio riskiness across the EU countries. To establish that, we have fitted a random slope two-level ordered logistic regression where the portfolio riskiness was the response variable, as in the previous regressions, where we have introduced a random slope for age. The sole purpose of the model was to analyze if the impact of age is different across the sample countries, therefore, we have reduced the number of

predictors to achieve model convergence. The working variable was included to identify the influence of employment on the investment behavior of elder persons. The results of the model with a random slope for age are illustrated in Table 4.

We have maintained a variable related to digital skills since we were interested in determining the influence of country-level digital literacy on investment riskiness. Maximum likelihood was used as an estimation method for the coefficients and the cut points.

The results of the LR test indicate that the addition of a random slope for age is justified at the 0.01 threshold and the age effect varies across countries, and this specification captures the relationship better than a model without the random slope for age.

The model indicates a negative and statistically significant relationship between age and portfolio riskiness, indicating that older individuals are less prone to invest in risky assets compared to younger persons. This is consistent with previous findings in the literature and age may influence the propensity to own stocks through multiple channels. Elder persons normally encounter higher health risks compared to younger individuals, which may determine them to be more risk-averse. The current health status and the expected health status negatively influence the proportion of risky assets (Edwards, 2008). The increased health risks of elder persons may cause them to reduce their allocation of capital toward risky assets. Older persons are likely to face higher future medical expenditures compared to younger persons. Poor health and risky asset ownership were found to be negatively related (Rosen and Wu, 2004). Another plausible explanation for the risk aversion of older persons is that their investment horizon is shorter compared to younger investors, who have a longer timespan to recover losses.

The relationship between life satisfaction and the response variable is positive and statistically significant in the random slope model for age and in the previous models. The positive correlation and the statistical significance are maintained also for the variable denoting the above basic level of digital skills. The variable of material and social deprivation maintains a negative correlation to portfolio riskiness, as in the previous models.

**Table 4.** Ordered logistic regression with a random slope for age

| VARIABLES                                                    | (1)<br>Portfolio<br>riskiness |
|--------------------------------------------------------------|-------------------------------|
| Age                                                          | -0.0170***<br>(0.00386)       |
| Life satisfaction                                            | 0.103***<br>(0.00850)         |
| Above basic level of digital skills (for persons aged 55-74) | 8.317***<br>(2.543)           |
| Working                                                      | 0.302***<br>(0.0429)          |
| Severely materially and socially deprived                    | -9.788***<br>(2.960)          |
| Observations                                                 | 41,985                        |
| Number of groups                                             | 25                            |

Standard errors in parentheses  
\*\*\* p<0.01, \*\* p<0.05, \* p<0.1

The influence of age on the investment behavior of older individuals between the countries from the sample was examined. We have introduced this analysis based on theoretical considerations considering expected heterogeneity across the EU states, namely that the varying economic conditions, cultural norms, and regulatory frameworks can influence retirement investment behavior. From a practical perspective, understanding the manner age influences investment behavior during the retirement phase across the EU states is necessary for establishing adequate policies by policymakers. The results of the models can serve as information for tailoring retirement planning policies or financial education programs to specific age groups and regions, to promote healthy financial behavior during retirement.

The age slopes were plotted against the country intercepts in Figure 2, based on the ordered logistic regression with a random slope for age. The coefficients of age in the random slope model indicate that age impacts differently the investment behavior across the European Union countries. The countries in the top-left quadrant are countries that had lower-than-average portfolio riskiness but better-than-average participation as age increases. For instance, the most prominent differences in investment behavior when age is considered are present in France, indicating that if age increases, individuals are more willing to own risky assets, namely stocks. Other countries such as Malta, Hungary, Luxembourg, Cyprus, Greece, Germany, and Finland are all in the same group. For the aforementioned countries, age has a positive impact on the propensity to own risky assets.

In the bottom-left quadrant are present countries with below-average mean portfolio riskiness with below-average slopes. This category includes Romania, the Netherlands, and Latvia. The interest for risky assets in these countries was lower than the mean and the inclination to own shares decreased as individuals aged.

For all the other countries in the right quadrants, the portfolio riskiness was higher than the average, with age having a positive impact on portfolio riskiness for the countries situated in the top-right quadrant, and a negative impact for the ones in the bottom-right quadrant.

**Figure 2.** Age slopes versus country intercepts

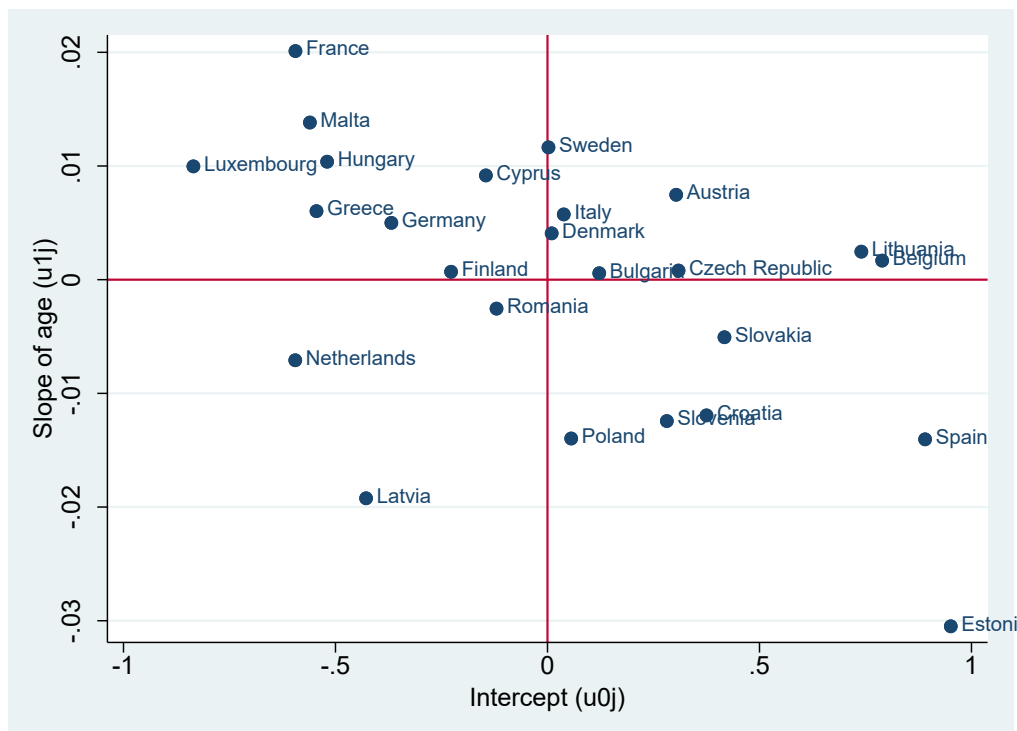

## 5. Discussion and conclusions

This paper examined the propensity of older persons to invest in risky assets considering their digital skills, using individual- and country-level data from SHARE, Eurostat, and the Digital Economy and Society Index.

Our contribution to the literature is threefold. Firstly, it extends the literature on portfolio allocation among elder individuals by investigating the influence of digital skills at individual- and country- levels on portfolio riskiness. To our knowledge, the impact of digital skills and the propensity to own risky assets has not been considered yet by research papers. The empirical findings suggest that reducing the digital gap might improve the access of older individuals to riskier financial assets, which may in turn create investment opportunities. Secondly, the introduction of novel variables into the empirical analysis at the individual- and country levels might serve as a starting point in policy formulation for interventions to reduce the digital gap. Thirdly, we have combined data retrieved from wave eight of SHARE with data from international databases, which permitted us to portray the impact of digital skills at the individual level, as well as the country level, on portfolio preferences.

Our study is particularly relevant since it explores the relationship between the digital skills of senior citizens and portfolio riskiness in the EU, using a methodological framework that permits us to analyze the differences across countries, which is necessary for policy interventions. Furthermore, the global context in which the population ages and the life expectancy increases implies that senior citizens comprise a growing percentage of the total population and the potential users of ICT. Consequently, persons spend a longer period of their lives as senior citizens, which indicates the necessity of acquiring digital skills and updating them, to bridge digital gaps and ensure well-being, including financial well-being.

The appropriateness of the methodological framework was considered after running LR tests and examining the VPC, which indicates clustering effects across the EU countries. The tests were in favor of multilevel models and suggested the specifications with a random intercept for the country and a random slope for age. The presence of covariates in our model was indicated by the LR tests compared to a null multilevel model.

Our results suggest the presence of positive and statistically significant relationships between digital skills and portfolio riskiness, indicating that individuals with digital skills are more prone to invest in risky assets, namely stocks, either directly or indirectly. Both individual-level variables that considered digital skills were statistically significant: computer skills and the use of the internet in the last 7 days. A similar result was obtained for the country-level variable denoting the above digital skills, which had a positive impact on portfolio riskiness. The results are consistent with our expectations since digital skills are required to absorb financial information and participate in the stock market.

Moreover, the interest in risky financial assets in the EU was heterogeneous. The lowest interest for risky financial assets was observed in Latvia, Romania, and Bulgaria, while Nordic countries such as Finland, Denmark, and Sweden were the least financially risk-averse and more likely to participate in the stock market. Previous studies from the literature have identified high participation in the stock market in Nordic countries (Angelini and Cavapozzi, 2016; Georgarakos and Pasini, 2011). Another empirical finding suggests that age influences differently the investment behavior of individuals across the EU countries, based on the results of the regression with a random slope for age.

The results from our paper may serve as policy recommendations. The reduction of the digital divide should represent a policy debate among the EU member states for subsequent



interventions to reduce the gap, especially among vulnerable categories such as elder persons. The lack of addressing this issue might exacerbate existing divides and possibly result in further segregation of individuals in society based on their digital literacy. The digitalization of financial services will hinder vulnerable categories from investing in financial assets (i.e., elder persons). Assuring assistance regarding the use and benefits of digital services to deprived people must be considered since such persons may have integration difficulties.

Furthermore, the globalization of capital markets can potentially explain the lack of statistical significance of the Real GDP/capita variable in our models, suggesting that the evolution of external markets has a greater influence on the investment behavior of older individuals, as opposed to the origin's country's economic conditions.

The main limitation identified in our paper concerns the variables used in the empirical analysis, namely the response variable is a categorical variable proxy for portfolio riskiness. Even though it is based on theoretical considerations from prior studies in the literature, it led to an exclusion of individuals from the sample that could be allocated to two risk groups at the same time. A more precise measurement of portfolio riskiness may be considered, which makes a distinction between directly holding stocks or indirectly owning stocks. Since our contribution is novel regarding the relationship between digital skills and portfolio riskiness, upon our knowledge, a drawback is related to the lack of the possibility of confronting our results with prior studies from the literature.

Digitalization may serve as a barrier for elder persons in investing in stocks since they may not have a mobile bank app/digital brokerage account or are not willing to trust such apps. Therefore, elder persons may lose significant investment opportunities and may not allocate their wealth adequately, especially in periods with high inflationary pressure, in which their wealth will diminish. Moreover, the lack of digital skills will not only refrain elder persons from participating in the stock market but will affect other aspects of their lives as well since digitalization will be implemented in other sectors and governance.

## Acknowledgments

This paper uses data from SHARE Wave 8 (DOI: 10.6103/SHARE.w8.800) see Börsch-Supan et al. (2013) for methodological details.(1) The SHARE data collection has been funded by the European Commission, DG RTD through FP5 (QLK6-CT-2001-00360), FP6 (SHARE-I3: RII-CT-2006-062193, COMPARE: CIT5-CT-2005-028857, SHARELIFE: CIT4-CT-2006-028812), FP7 (SHARE-PREP: GA N°211909, SHARE-LEAP: GA N°227822, SHARE M4: GA N°261982, DASISH: GA N°283646) and Horizon 2020 (SHARE-DEV3: GA N°676536, SHARE-COHESION: GA N°870628, SERISS: GA N°654221, SSHOC: GA N°823782, SHARE-COVID19: GA N°101015924) and by DG Employment, Social Affairs & Inclusion through VS 2015/0195, VS 2016/0135, VS 2018/0285, VS 2019/0332, and VS 2020/0313. Additional funding from the German Ministry of Education and Research, the Max Planck Society for the Advancement of Science, the U.S. National Institute on Aging (U01\_AG09740-13S2, P01\_AG005842, P01\_AG08291, P30\_AG12815, R21\_AG025169, Y1-AG-4553-01, IAG\_BSR06-11, OGHA\_04-064, HHSN271201300071C, RAG052527A) and from various national funding sources is gratefully acknowledged (see [www.share-project.org](http://www.share-project.org)).

## References

1. Angelini, Viola, and Danilo Cavapozzi. "Dispositional optimism and stock investments." *Journal of economic psychology* 59 (2017): 113-128.
2. Atella, Vincenzo, Marianna Brunetti, and Nicole Maestas. "Household portfolio choices, health status and health care systems: A cross-country analysis based on SHARE." *Journal of banking & finance* 36.5 (2012): 1320-1335.
3. Bailey, Jeffrey J., and Chris Kinerson. "Regret avoidance and risk tolerance." *Journal of Financial Counseling & Planning* 16.1 (2005).
4. Banks, James, Elena Bassoli, and Irene Mammi. "Changing attitudes to risk at older ages: The role of health and other life events." *Journal of Economic Psychology* 79 (2020): 102208.
5. Berkowsky, Ronald W., Joseph Sharit, and Sara J. Czaja. "Factors predicting decisions about technology adoption among older adults." *Innovation in aging* 1.3 (2017): igy002.
6. Bertocchi, Graziella, Marianna Brunetti, and Costanza Torricelli. "Marriage and other risky assets: A portfolio approach." *Journal of Banking & Finance* 35.11 (2011): 2902-2915.
7. Botrić, Valerija, and Ljiljana Božić. "The digital divide and E-government in European economies." *Economic Research-Ekonomska Istraživanja* 34.1 (2021): 2935-2955.
8. Börsch-Supan, A. (2022). Survey of Health, Ageing and Retirement in Europe (SHARE) Wave 8. Release version: 8.0.0. SHARE-ERIC. Data set. DOI: 10.6103/SHARE.w8.800
9. Börsch-Supan, A., M. Brandt, C. Hunkler, T. Kneip, J. Korbmacher, F. Malter, B. Schaan, S. Stuck, S. Zuber (2013). Data Resource Profile: The Survey of Health, Ageing and Retirement in Europe (SHARE). *International Journal of Epidemiology*. DOI: 10.1093/ije/dyt088.
10. Brown, Sarah, and Karl Taylor. "Household finances and the 'Big Five' personality traits." *Journal of Economic Psychology* 45 (2014): 197-212.
11. Bucciol, Alessandro, and Luca Zarri. "Do personality traits influence investors' portfolios?." *Journal of Behavioral and Experimental Economics* 68 (2017): 1-12.
12. Cavapozzi, Danilo, Elisabetta Trevisan, and Guglielmo Weber. "Life insurance investment and stock market participation in Europe." *Advances in life course research* 18.1 (2013): 91-106.
13. Çılan, Çiğdem Arıcıgil, Bilge Acar Bolat, and Erman Coşkun. "Analyzing digital divide within and between member and candidate countries of European Union." *Government Information Quarterly* 26.1 (2009): 98-105.
14. Christelis, Dimitris, Tullio Jappelli, and Mario Padula. "Cognitive abilities and portfolio choice." *European Economic Review* 54.1 (2010): 18-38.
15. Conlin, Andrew, et al. "Personality traits and stock market participation." *Journal of Empirical Finance* 33 (2015): 34-50.
16. Cotten, Shelia R., et al. "Internet use and depression among older adults." *Computers in human behavior* 28.2 (2012): 496-499.
17. Digital Economy and Society Index (DESI). Accessible on: [https://digital-agenda-data.eu/datasets/digital\\_agenda\\_scoreboard\\_key\\_indicators/](https://digital-agenda-data.eu/datasets/digital_agenda_scoreboard_key_indicators/) [Last accessed: 18.03.2023].
18. Dewan, Sanjeev, and Frederick J. Riggins. "The digital divide: Current and future research directions." *Journal of the Association for information systems* 6.12 (2005): 298-337.
19. Dinç Aydemir, Sibel, and Selim Aren. "Do the effects of individual factors on financial risk-taking behavior diversify with financial literacy?." *Kybernetes* 46.10 (2017): 1706-1734.

20. Edwards, Ryan D. "Health risk and portfolio choice." *Journal of Business & Economic Statistics* 26.4 (2008): 472-485.
21. Elena-Bucea, Anca, et al. "Assessing the role of age, education, gender and income on the digital divide: Evidence for the European Union." *Information Systems Frontiers* 23 (2021): 1007-1021.
22. Faff, Robert, Terrence Hallahan, and Michael McKenzie. "Nonlinear linkages between financial risk tolerance and demographic characteristics." *Applied Economics Letters* 16.13 (2009): 1329-1332.
23. Friemel, Thomas N., and Sara Signer. "Web 2.0 literacy: Four aspects of the second-level digital divide." *Studies in Communication Sciences* 10.2 (2010): 143-166.
24. Friemel, Thomas N. "The digital divide has grown old: Determinants of a digital divide among seniors." *New media & society* 18.2 (2016): 313-331.
25. Gell, Nancy M., et al. "Patterns of technology use among older adults with and without disabilities." *The Gerontologist* 55.3 (2015): 412-421.
26. Georgarakos, Dimitris, and Giacomo Pasini. "Trust, sociability, and stock market participation." *Review of Finance* 15.4 (2011): 693-725.
27. Grable, John E. *Investor risk tolerance: Testing the efficacy of demographics as differentiating and classifying factors*. Diss. Virginia Tech, 1997.
28. Grable, John E., and So-Hyun Joo. "Environmental and biophysical factors associated with financial risk tolerance." *Journal of Financial Counseling and Planning* 15.1 (2004).
29. Guiso, Luigi, Michael Haliassos, and Tullio Jappelli, eds. *Household portfolios*. MIT press, 2002.
30. Headey, Bruce, Ruud Muffels, and Mark Wooden. "Money does not buy happiness: Or does it? A reassessment based on the combined effects of wealth, income and consumption." *Social Indicators Research* 87 (2008): 65-82.
31. Holgersson, Jesper, and Eva Söderström. "Bridging the gap: Exploring elderly citizens' perceptions of digital exclusion." 27th European Conference on Information Systems (ECIS), Stockholm & Uppsala, Sweden, June 8-14, 2019. Association for Information Systems, 2019.
32. Hurd, Michael D. "Portfolio holdings of the elderly." *Household portfolios* (2002): 431-472.
33. Lam, Lawrence, and Mary Lam. "The use of information technology and mental health among older care-givers in Australia." *Aging & mental health* 13.4 (2009): 557-562.
34. Rahman, Mahfuzur, Mohamed Albaity, and Che Ruhana Isa. "Behavioural propensities and financial risk tolerance: the moderating effect of ethnicity." *International Journal of Emerging Markets* 15.4 (2020): 728-745.
35. Powdthavee, Nattavudh. "How much does money really matter? Estimating the causal effects of income on happiness." *Empirical economics* 39 (2010): 77-92.
36. Ostrovsky-Berman, Ela, and Howard Litwin. "Social network and financial risk tolerance among investors nearing and during retirement." *Journal of Family and Economic Issues* 40 (2019): 237-249.
37. Quan-Haase, Anabel, Guang Ying Mo, and Barry Wellman. "Connected seniors: How older adults in East York exchange social support online and offline." *Information, Communication & Society* 20.7 (2017): 967-983.
38. Peña-López, Ismael. "Understanding the digital divide." (2001).

39. Real GDP per capita [SDG\_08\_10]. Eurostat. Accessible on: [https://ec.europa.eu/eurostat/databrowser/view/SDG\\_08\\_10/default/table](https://ec.europa.eu/eurostat/databrowser/view/SDG_08_10/default/table) [Last accessed: 18.03.2023].
40. Rosen H. S., Wu S. (2004), "Portfolio choice and health status", *Journal of Financial Economics*, 72, 457–484.
41. Severely materially and socially deprived people [TIPSLC30], Eurostat. Accessible on: <https://ec.europa.eu/eurostat/databrowser/view/TIPSLC30/default/table> [Last accessed: 18.03.2023].
42. Silver, Michelle Pannor. "Socio-economic status over the lifecourse and internet use in older adulthood." *Ageing & Society* 34.6 (2014): 1019-1034.
43. Sipior, Janice C., Burke T. Ward, and Regina Connolly. "The digital divide and t-government in the United States: using the technology acceptance model to understand usage." *European Journal of Information Systems* 20.3 (2011): 308-328.
44. Steele, Fiona. "Module 5: Introduction to Multilevel modelling concepts." *LEMMA (Learning Environment for Multilevel Methodology and Applications)*, Centre for Multilevel Modelling, University of Bristol (2008).
45. Tamborini, Christopher R., ChangHwan Kim, and Arthur Sakamoto. "Education and lifetime earnings in the United States." *Demography* 52.4 (2015): 1383-1407.
46. Van Deursen, Alexander JAM, and Ellen J. Helsper. "The third-level digital divide: Who benefits most from being online?." *Communication and information technologies annual*. Vol. 10. Emerald Group Publishing Limited, 2015. 29-52.
47. Van Dijk, Jan, and Kenneth Hacker. "The digital divide as a complex and dynamic phenomenon." *The information society* 19.4 (2003): 315-326.
48. Van Dijk, J. A. (2012). The evolution of the digital divide: The digital divide turns to inequality of skills and usage. *Digital Enlightenment Yearbook*, 2012, 57–75.
49. Vasilescu, Maria Denisa, et al. "Digital divide, skills and perceptions on digitalisation in the European Union—Towards a smart labour market." *PloS one* 15.4 (2020): e0232032.
50. Vassilakopoulou, Polyxeni, and Eli Hustad. "Bridging digital divides: a literature review and research agenda for information systems research." *Information Systems Frontiers* (2021): 1-15.
51. Warschauer, M. (2003). Dissecting the "digital divide": A case study in Egypt. *The Information Society*, 19(4), 297–304. <https://doi.org/10.1080/01972240309490>.
52. Xiong, Jie, and Meiyun Zuo. "How does family support work when older adults obtain information from mobile internet?." *Information Technology & People* 32.6 (2019): 1496-1516.
